# Supplementary material for: Prevalence and correlates of psychological distress, unmet supportive care needs, and fear of cancer recurrence among haematological cancer patients during the COVID-19 pandemic
Source: Research Square preprint supplement (doi:10.21203/rs.3.rs-161008/v1), 2021-02-25
Supplement: Supplementary file 1 [file c80f025c4475bd23ab2829ff.docx]

**Online Resource 2**

**Univariate linear regression assessing the factors associated with psychological distress, unmet supportive care needs, and fear of cancer recurrence**

**Univariate linear regression assessing the factors associated with psychological distress.**

| Variable | B [95% CI] | SE | β | *p* |
| --- | --- | --- | --- | --- |
| Gender (1 = Man, 2 = Woman) | 0.85 [-0.65 to 2.36] | .76 | .06 | .265 |
| Age | -0.17 [-0.23 to -0.11] | .03 | -.30 | .000 |
| Marital status (1 = Single, 2 = Married) | -2.02 [-3.67 to -0.37] | .84 | -.13 | .016 |
| Education (1 = < Tertiary, 2 = Tertiary) | 0.11 [-1.39 to 1.61] | .76 | .01 | .888 |
| Location (1 = Major cities, 2 = Regional) | -1.68 [-3.18 to -0.18] | .76 | -.12 | .028 |
| Dependants living at home | 0.33 [-1.01 to 1.67] | .68 | .04 | .623 |
| Employment (1 = Employed, 2 = Unemployed) | -0.49 [-2.05 to 1.07] | .79 | -.03 | .536 |
| Time since diagnosis | 0.11 [-0.23 to 0.01] | .06 | -.10 | .058 |
| Number of pre-existing health conditions | 1.27 [0.73 to 1.81] | .27 | .24 | .000 |
| Diagnosis type (Ref category = Lymphoma)  Leukaemia  Myeloma  Myelodysplastic syndrome (MDS)  Myeloproliferative neoplasm (MPN)  Amyloidosis | 0.38 [-1.55 to 2.29]  -1.84 [-3.99 to 0.33]  0.65 [-3.16 to 4.46]  1.45 [-2.36 to 5.26]  0.95 [-6.13 to 8.03] | .98  1.09  1.94  1.94  3.59 | .02  -.10  .02  .04  .01 | .702  .096  .737  .454  .792 |
| Current circumstances  (Ref category = Completed treatment and in remission)  Not yet started treatment  Undergoing treatment  Ongoing treatment to manage disease | 3.18 [-0.09 to 6.46]  -1.03 [-3.54 to 1.49]  0.58 [-1.19 to 2.36] | 1.67  1.28  .90 | .12  -.05  .04 | .057  .424  .519 |
| Concern about impact of COVID-19 on cancer management | 2.13 [1.54 to 2.72] | .30 | .36 | .000 |
| Total unmet needs | 0.27 [0.20 to 0.34] | .04 | .39 | .000 |
| Concerns during COVID-19  Financial concerns  Lost income  Family support  Restricted access to care due to travel bans  Contact with care team  Adequate support from care team | 2.93 [2.00 to 3.85]  0.46 [0.07 to 0.85]  0.59 [0.20 to 0.98]  0.52 [0.13 to 0.91]  -0.28 [-0.86 to 0.31]  -0.22 [-0.76 to 0.32] | .47  .19  .19  .19  .29  .27 | .32  .12  .16  .14  -.05  -.04 | .000  .021  .003  .009  .349  .42 |
| Perceived risk of contracting COVID-19 | 0.58 [0.40 to 0.76] | .09 | .33 | .000 |

B, unstandardized regression coefficient; CI, confidence interval; SE, standard error; ß, standardized regression coefficient

**Univariate linear regression assessing the factors associated with unmet supportive care needs.**

| Variable | B [95% CI] | SE | β | *p* |
| --- | --- | --- | --- | --- |
| Gender (1 = Man, 2 = Woman) | 2.141 [.22 to 4.06] | .67 | .11 | .029 |
| Age | -.143 [-.22 to -.07] | .04 | -.19 | .000 |
| Marital status (1 = Single, 2 = Married) | -.1.337 [-3.46 to .78] | 1.08 | -.06 | .216 |
| Education (1 = < Tertiary, 2 = Tertiary) | 1.49 [-0.43 to 3.41] | .98 | .08 | .128 |
| Location (1 = Major cities, 2 = Regional) | 0.30 [-1.65 to 2.25] | .99 | .02 | .763 |
| Dependants living at home | 0.24 [-1.64 to 2.12] | .95 | .02 | .800 |
| Employment (1 = Employed, 2 = Unemployed) | -0.35 [-2.35 to 1.66] | 1.02 | -.02 | .734 |
| Time since diagnosis | -0.03 [-0.18 to 0.12] | .08 | -.02 | .666 |
| Psychological distress (K10) | 0.56 [0.42 to 0.69] | .07 | .39 | .000 |
| Number of pre-existing health conditions | 0.13 [-0.59 to 0.84] | .36 | .02 | .732 |
| Diagnosis type (Ref category = Lymphoma)  Leukaemia  Myeloma  Myelodysplastic syndrome (MDS)  Myeloproliferative neoplasm (MPN)  Amyloidosis | -1.03 [-3.51 to 1.46]  -1.42 [-4.20 to 1.37]  -1.87 [-6.81 to 3.07]  1.07 [-3.87 to 6.02]  -2.26 [-11.00 to 6.49] | 1.26  1.42  2.51  2.51  4.45 | -.05  -.06  -.04  .02  -.03 | .417  .319  .458  .67  .612 |
| Current circumstances (Ref category = Completed treatment and in remission)  Not yet started treatment  Undergoing treatment  Ongoing treatment to manage disease | -0.03 [-3.89 to 3.84]  -0.62 [-3.78 to 2.54]  0.56 [-1.60 to 2.73] | 1.97  1.61  1.10 | -.00  -.02  .03 | .988  .699  .610 |
| Concern about impact of COVID-19 on cancer management | 2.52 [1.65 to 3.39] | .44 | .29 | .000 |
| Concerns during COVID-19  Financial concerns  Lost income  Family support  Restricted access to care due to travel bans  Contact with care team  Adequate support from care team | 2.20 [0.83 to 3.58]  0.87 [0.35 to 1.39]  0.12 [-0.42 to 0.65]  0.27 [-0.26 to 0.80]  -0.59 [-1.37 to 0.19]  -1.08 [-1.79 to -0.38] | .69  .27  .27  .27  .39  .36 | .17  .17  .02  .05  -.08  -.16 | .002  .001  .663  .313  .138  .003 |
| Perceived risk of contracting COVID-19 | 0.67 [0.49 to 0.85] | .09 | .35 | .000 |

B, unstandardized regression coefficient; CI, confidence interval; SE, standard error; ß, standardized regression coefficient

**Univariate linear regression assessing the factors associated with fear of cancer recurrence.**

| Variable | B [95% CI] | SE | β | *p* |
| --- | --- | --- | --- | --- |
| Gender (1 = Man, 2 = Woman) | 1.01 [-1.28 to 3.29] | 1.16 | .08 | .384 |
| Age | -0.13 [-0.21 to -0.05] | .04 | -.27 | .002 |
| Marital status (1 = Single, 2 = Married) | -0.93 [-3.34 to 1.49] | 1.22 | -.07 | .450 |
| Education (1 = < Tertiary, 2 = Tertiary) | 0.78 [-1.51 to 3.06] | 1.15 | .06 | .502 |
| Location (1 = Major cities, 2 = Regional) | 1.96 [-0.31 to 4.23] | 1.15 | .15 | .090 |
| Dependants living at home | 1.27 [-0.77 to 3.29] | 1.01 | .17 | .216 |
| Employment (1 = Employed, 2 = Unemployed) | -0.53 [-2.83 to 1.77] | 1.16 | -.04 | .649 |
| Time since diagnosis | -0.07 [-0.23 to 0.08] | .08 | -.08 | .338 |
| Psychological distress (K10) | 0.41 [0.26 to 0.56] | .08 | .43 | .000 |
| Number of pre-existing health conditions | 0.64 [-0.35 to 1.63] | .49 | .11 | .201 |
| Diagnosis type (Ref category = Lymphoma)  Leukaemia  Myeloma  Myelodysplastic syndrome (MDS)  Amyloidosis | -0.92 [-3.56 to 1.74]  1.77 [-1.93 to 5.46]  -3.27 [-9.41 to 2.86]  0.33 [-9.16 to 9.82] | 1.35  1.87  3.10  4.79 | -.06  .09  -.09  .01 | .495  .346  .293  .946 |
| Concern about impact of COVID-19 on cancer management | 2.51 [1.56 to 3.46] | .48 | .42 | .000 |
| Total unmet needs | 0.19 [0.07 to 0.31] | .06 | .26 | .002 |
| Concerns during COVID-19  Financial concerns  Lost income  Family support  Restricted access to care due to travel bans  Contact with care team  Adequate support from care team | -1.39 [-2.94 to 0.16]  0.20 [-0.41 to 0.81]  0.37 [-0.20 to 0.95]  0.32 [-0.28 to 0.91]  -0.43 [-1.32 to 0.46]  -0.47 [-1.28 to 0.34] | .78  .31  .29  .30  .45  .41 | .16  .06  .11  .09  -.08  -.10 | .079  .514  .203  .290  .337  .250 |
| Perceived risk of contracting COVID-19 | 0.52 [0.27 to 0.77] | .13 | .34 | .000 |

B, unstandardized regression coefficient; CI, confidence interval; SE, standard error; ß, standardized regression coefficient

**Journal name:** Supportive Care in Cancer

**Title:** Prevalence and correlates of psychological distress, unmet supportive care needs, and fear of cancer recurrence among haematological cancer patients during the COVID-19 pandemic

**Authors:** Nienke Zomerdijk 1, 2*, Michelle Jongenelis 1, 4, Camille E Short 1, 3, 4, Andrew Smith 5, Jane Turner 6, 7, Katherine Huntley 5

1. Melbourne School of Psychological Sciences, University of Melbourne, VIC, Australia
2. Victorian Comprehensive Cancer Centre Alliance, Melbourne, VIC, Australia
3. School of Health Sciences, University of Melbourne, VIC, Australia
4. Melbourne Centre for Behaviour Change, University of Melbourne, VIC, Australia
5. Leukaemia Foundation, Australia
6. Faculty of Medicine, University of Queensland, Brisbane, QLD, Australia
7. Royal Brisbane and Women’s Hospital, Brisbane, QLD, Australia

*Corresponding author: Nienke Zomerdijk, Melbourne School of Psychological Sciences, University of Melbourne, VIC, 3000, Australia. Email: [nienke.zomerdijk@unimelb.edu.au](mailto:nienke.zomerdijk@unimelb.edu.au)
